# Supplementary material
Source: Springer Nature journal article supplement (https://www.springermedizin.de/resource/supplementary/12890_2011_335_MOESM3_ESM.pdf/9505038)

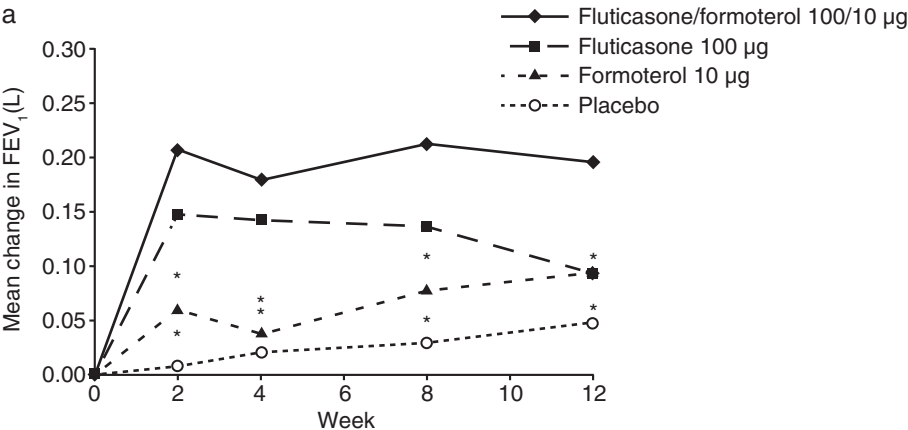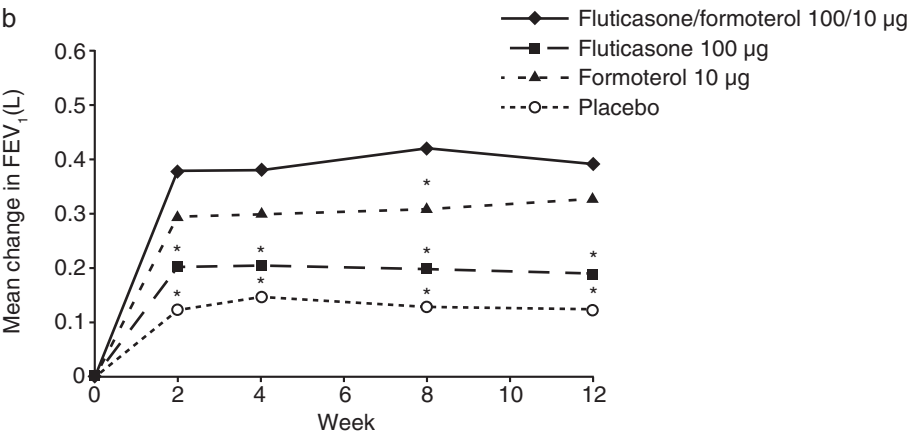

Supplement: MOESM3 [file 9505038]
